# Supplementary material for: Functional genomics study of acute heat stress response in the small yellow follicles of layer-type chickens
Source: PubMed Central journal article supplement (PMC5778056; doi:10.1038/s41598-017-18335-5), 2018-01-22
Supplement: 41598_2017_18335_MOESM1_ESM.pdf [file 41598_2017_18335_MOESM1_ESM.pdf]

# Functional genomics study of acute heat stress response in the small yellow follicles of layer-type chickens

Chuen-Yu Cheng<sup>1</sup>, Wei-Lin Tu<sup>1</sup>, Chao-Jung Chen<sup>2,3</sup>, Hong-Lin Chan<sup>4,5</sup>, Chih-Feng Chen<sup>1,6,7</sup>, Hsin-Hsin Chen<sup>1</sup>, Pin-Chi Tang<sup>1,2</sup>, Yen-Pai Lee<sup>1</sup>, Shuen-Ei Chen<sup>1,6,7,\*</sup> and San-Yuan Huang<sup>1,6,7,8,\*</sup>

## Supplementary information

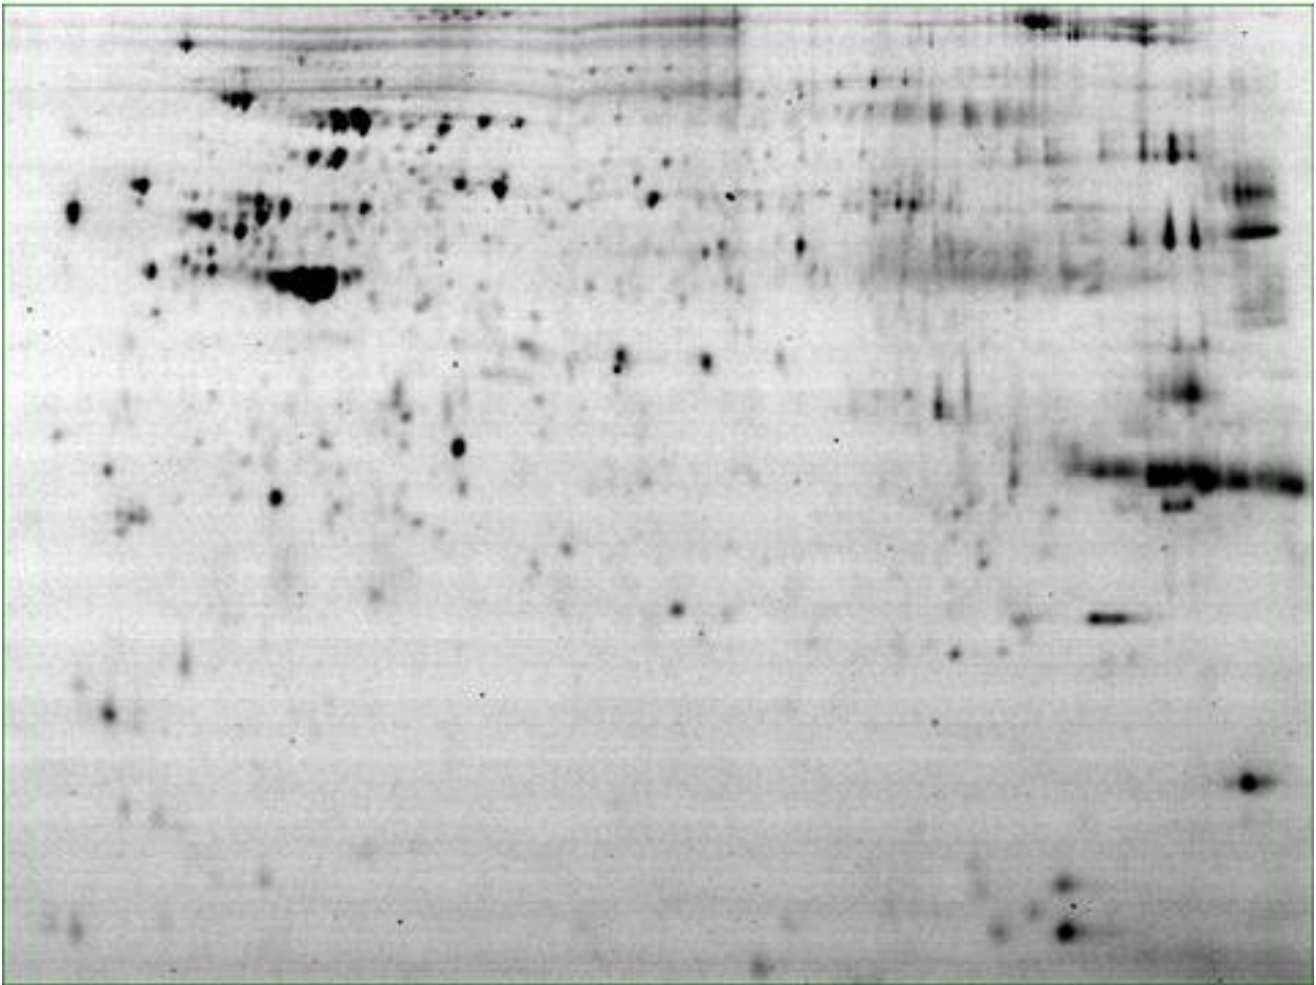

Supplementary Fig. S1. The two dimensional difference gel electrophoresis raw patterns of SYFs of L2 strain Taiwan country chicken.

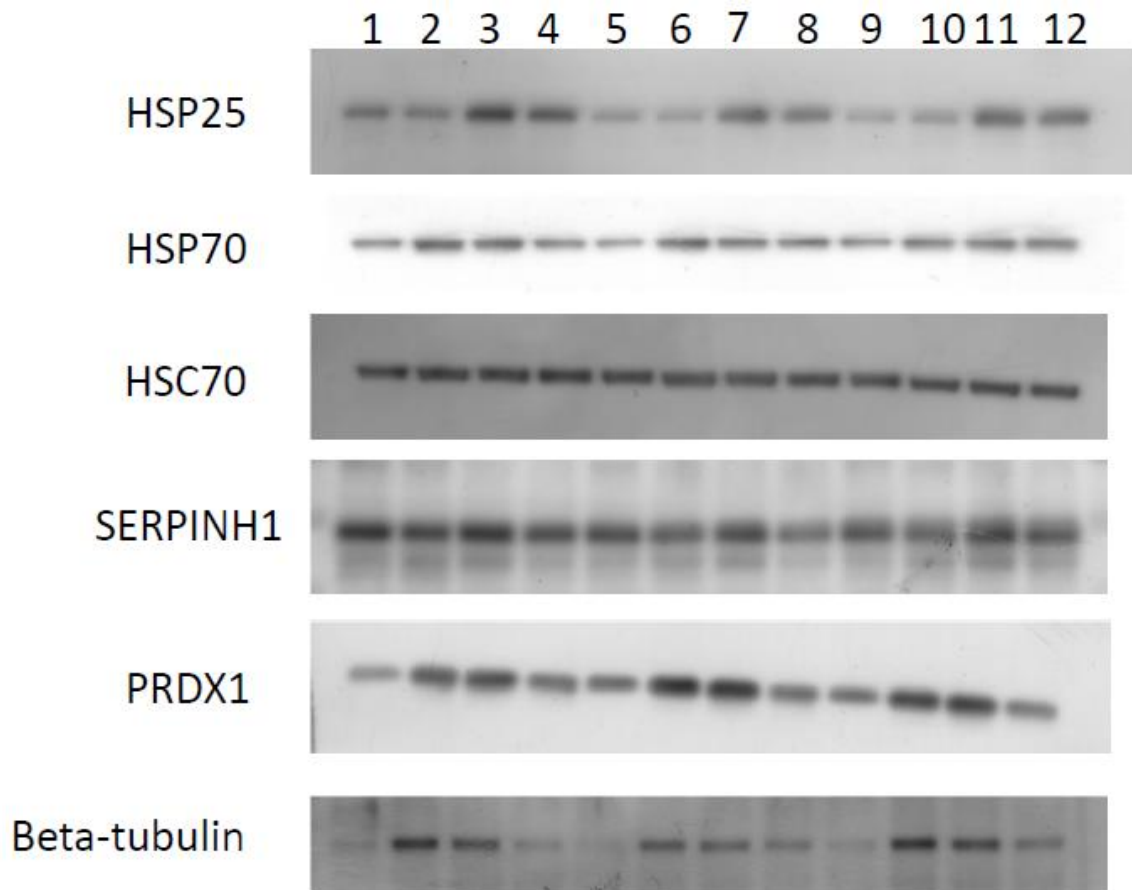

Supplementary Fig. S2. The raw patterns of western blot analysis. HSP25, heat shock protein 25; HSP70, heat shock protein 70; HSC70, heat shock cognate 70; SERPINH1, heat shock protein 47; PRDX1, peroxiredoxin-1. Column 1, 5, and 9, control group; Column 2, 6, and 10, acute heat stressed and without recovery period group; Column 3, 7, and 11, acute heat stressed with 2 h recovery period group; Column 4, 8, and 12, acute heat stressed with 6 h recovery period group.

Supplementary Table S1. The differentially expressed mRNAs in SYFs of layer-type L2 strain Taiwan country chickens after acute heat stress<sup>#</sup>.

| Probe Name   | H4R0/CTL | H4R2/CTL | H4R6/CTL | Gene symbol | GenBank accession | UniGene ID | Description                                                                                                                 |
|--------------|----------|----------|----------|-------------|-------------------|------------|-----------------------------------------------------------------------------------------------------------------------------|
| A_87_P052466 | -1.311   | -1.160   | -2.101   | AATF        | NM_001030724      | Gga.7407   | Gallus gallus apoptosis antagonizing transcription factor (AATF), mRNA [NM_001030724]                                       |
| A_87_P132523 | 2.057    | 2.370    | 2.151    | ACHE        | AJ698861          | Gga.52373  | Gallus gallus partial mRNA for acetylcholinesterase (ACHE gene). [AJ698861]                                                 |
| A_87_P056391 | 1.382    | 2.109    | 1.381    | ACSL5       | NM_001031237      | Gga.7847   | Gallus gallus acyl-CoA synthetase long-chain family member 5 (ACSL5), mRNA [NM_001031237]                                   |
| A_87_P027203 | 1.316    | -2.014   | 1.420    | ACVR1C      | BU428138          | Gga.31405  | activin A receptor, type IC [Source:HGNC Symbol;Acc:18123] [ENSGALT00000020491]                                             |
| A_87_P024780 | -1.501   | -1.312   | -2.128   | ADAMTSL3    | BX929295          | Gga.55480  | ADAMTS-like 3 [Source:HGNC Symbol;Acc:14633] [ENSGALT00000009854]                                                           |
| A_87_P099416 | -1.031   | -2.390   | -2.673   | AKD1        | XM_004940311      |            | adenylate kinase 9 [Source:HGNC Symbol;Acc:33814] [ENSGALT00000024568]                                                      |
| A_87_P021960 | 1.336    | 1.367    | 2.182    | ANO1        | BX935750          | Gga.53861  | Gallus gallus finished cDNA, clone ChEST41d3. [BX935750]                                                                    |
| A_87_P012184 | 1.770    | 2.229    | 1.043    | APOB        | NM_001044633      | Gga.4112   | Gallus gallus apolipoprotein B (including Ag(x) antigen) (APOB), mRNA [NM_001044633]                                        |
| A_87_P012759 | 2.052    | -1.107   | 1.484    | AQP12       | NM_001109679      | Gga.53127  | Gallus gallus aquaporin 12 (AQP12), mRNA [NM_001109679]                                                                     |
| A_87_P294402 | 2.350    | 1.247    | 1.429    | ARIH1       | NM_001030387      | Gga.53210  | Gallus gallus ariadne homolog, ubiquitin-conjugating enzyme E2 binding protein, 1 (Drosophila) (ARIH1), mRNA [NM_001030387] |
| A_87_P075601 | 1.933    | 2.670    | 2.474    | B2M         | NM_001001750      | Gga.1328   | Gallus gallus beta-2-microglobulin (B2M), mRNA [NM_001001750]                                                               |
| A_87_P120898 | 2.486    | -1.390   | 1.418    | BAIAP2L2    | CR385417          | Gga.15220  | Gallus gallus finished cDNA, clone ChEST596f1. [CR385417]                                                                   |
| A_87_P302598 | 1.366    | 2.051    | 1.128    | C2H6ORF62   | CR523630          | Gga.20197  | chromosome 6 open reading frame 62 [Source:HGNC Symbol;Acc:20998] [ENSGALT00000030973]                                      |
| A_87_P260383 | 1.483    | 2.383    | 1.317    | C2H8ORF84   | XM_429743         |            | somatomedin B and thrombospondin, type 1 domain containing [Source:HGNC Symbol;Acc:30362] [ENSGALT00000025208]              |
| A_87_P060201 | -2.942   | -1.709   | -5.853   | C4          | NM_001077233      | Gga.16394  | Gallus gallus complement 4 (C4), mRNA [NM_001077233]                                                                        |
| A_87_P025992 | -1.641   | -2.170   | -2.705   | C5          | BU463842          | Gga.27675  | complement component 5 [Source:HGNC Symbol;Acc:1331] [ENSGALT0000002379]                                                    |
| A_87_P085261 | 1.072    | 2.087    | 1.337    | C5H14ORF45  | CR405825          | Gga.11956  | coiled-coil domain containing 176 [Source:HGNC Symbol;Acc:19855] [ENSGALT00000032568]                                       |
| A_87_P130708 | -1.713   | -2.058   | -1.124   | CA2         | NM_205317         | Gga.3986   | Gallus gallus carbonic anhydrase II (CA2), mRNA [NM_205317]                                                                 |
| A_87_P023735 | 1.989    | 3.287    | 4.033    | CA5B        | BX931926          | Gga.53563  | Uncharacterized protein [Source:UniProtKB/TrEMBL;Acc:F1N986] [ENSGALT00000009408]                                           |
| A_87_P075221 | 2.350    | 3.452    | 4.779    | CA5B        | BX931926          | Gga.53563  | Uncharacterized protein [Source:UniProtKB/TrEMBL;Acc:F1N986] [ENSGALT00000009408]                                           |
| A_87_P217153 | -1.502   | -1.852   | -2.474   | CA7         | BU123298          | Gga.40333  | carbonic anhydrase VII [Source:HGNC Symbol;Acc:1381] [ENSGALT00000008318]                                                   |
| A_87_P035639 | -1.273   | 2.040    | 1.266    | CASD1       | AJ851642          | Gga.31495  | Gallus gallus mRNA for hypothetical protein, clone 14m6. [AJ851642]                                                         |
| A_87_P072166 | -1.358   | -2.147   | -1.758   | CCDC78      | BU366103          | Gga.45507  | Uncharacterized protein [Source:UniProtKB/TrEMBL;Acc:R4GI76] [ENSGALT00000045501]                                           |
| A_87_P016539 | 1.946    | 2.003    | -1.160   | CDKL2       | CR386352          | Gga.13424  | cyclin-dependent kinase-like 2 (CDC2-related kinase) [Source:HGNC Symbol;Acc:1782] [ENSGALT00000016460]                     |

|              |        |        |        |         |              |           |                                                                                                                                             |
|--------------|--------|--------|--------|---------|--------------|-----------|---------------------------------------------------------------------------------------------------------------------------------------------|
| A_87_P030709 | 1.021  | -1.413 | -2.027 | CFTR    | NM_001105666 | Gga.27462 | Gallus gallus cystic fibrosis transmembrane conductance regulator (ATP-binding cassette sub-family C, member 7) (CFTR), mRNA [NM_001105666] |
| A_87_P009694 | -2.205 | 1.172  | 1.049  | CIRBP   | NM_001031347 | Gga.42673 | Gallus gallus cold inducible RNA binding protein (CIRBP), mRNA [NM_001031347]                                                               |
| A_87_P054071 | -2.333 | 1.377  | 1.298  | CIRBP   | NM_001031347 | Gga.42673 | Gallus gallus cold inducible RNA binding protein (CIRBP), mRNA [NM_001031347]                                                               |
| A_87_P013516 | -1.824 | -1.442 | -2.368 | CLUAP1  | CR391360     | Gga.15912 | Gallus gallus finished cDNA, clone ChEST264b15. [CR391360]                                                                                  |
| A_87_P008806 | -1.452 | -1.661 | -2.276 | CNTN4   | X85809       | Gga.55020 | Uncharacterized protein [Source:UniProtKB/TrEMBL;Acc:F1P3U6] [ENSGALT00000013444]                                                           |
| A_87_P134355 | 1.464  | 2.152  | -1.068 | COR6    | NM_001031544 | Gga.32089 | Gallus gallus chick olfactory receptor 6 (COR6), mRNA [NM_001031544]                                                                        |
| A_87_P135305 | 1.758  | 2.494  | 1.357  | CREB3L3 | BX929691     | Gga.7247  | Gallus gallus finished cDNA, clone ChEST800b2. [BX929691]                                                                                   |
| A_87_P010130 | 2.195  | 1.382  | -1.292 | CRELD2  | NM_001199497 | Gga.11562 | Gallus gallus cysteine-rich with EGF-like domains 2 (CRELD2), mRNA [NM_001199497]                                                           |
| A_87_P009329 | 1.097  | 2.437  | 1.556  | CSNK2B  | NM_001257204 | Gga.34034 | Gallus gallus casein kinase 2, beta polypeptide (CSNK2B), mRNA [NM_001257204]                                                               |
| A_87_P057226 | -1.560 | -1.430 | -2.582 | CYP19A1 | NM_001001761 | Gga.859   | Gallus gallus cytochrome P450, family 19, subfamily A, polypeptide 1 (CYP19A1), mRNA [NM_001001761]                                         |
| A_87_P008373 | -1.061 | -2.086 | 1.330  | CYTB    |              |           | Cytochrome b [Source:UniProtKB/Swiss-Prot;Acc:P18946] [ENSGALT00000029080]                                                                  |
| A_87_P173053 | 2.097  | -1.022 | 1.970  | CYTH4   | NM_001012815 | Gga.12335 | Gallus gallus cytohesin 4 (CYTH4), mRNA [NM_001012815]                                                                                      |
| A_87_P112188 | 1.931  | 2.250  | 1.113  | DDX3X   | NM_001030800 | Gga.12607 | Gallus gallus DEAD (Asp-Glu-Ala-Asp) box polypeptide 3, X-linked (DDX3X), mRNA [NM_001030800]                                               |
| A_87_P297388 | 1.890  | 2.077  | 1.187  | DDX3X   | NM_001030800 | Gga.12607 | Gallus gallus DEAD (Asp-Glu-Ala-Asp) box polypeptide 3, X-linked (DDX3X), mRNA [NM_001030800]                                               |
| A_87_P024343 | -1.798 | 1.174  | -2.696 | DHRS4   | NM_001277125 | Gga.35194 | Gallus gallus dehydrogenase/reductase (SDR family) member 4 (DHRS4), mRNA [NM_001277125]                                                    |
| A_87_P083476 | -1.595 | -2.581 | -2.880 | DRD4    | NM_001142849 | Gga.34426 | Gallus gallus dopamine receptor D4 (DRD4), mRNA [NM_001142849]                                                                              |
| A_87_P080681 | -1.069 | -2.035 | 1.046  | DRGX    | AB736185     |           | Uncharacterized protein [Source:UniProtKB/TrEMBL;Acc:R4GG90] [ENSGALT00000046207]                                                           |
| A_87_P262338 | 1.004  | -1.051 | 2.606  | DSTN    | NM_205528    | Gga.4895  | Gallus gallus destrin (actin depolymerizing factor) (DSTN), mRNA [NM_205528]                                                                |
| A_87_P032542 | 1.189  | -2.770 | 1.691  | EPB42   | BU226370     | Gga.44220 | erythrocyte membrane protein band 4.2 [Source:HGNC Symbol;Acc:3381] [ENSGALT00000007669]                                                    |
| A_87_P065901 | 2.035  | -1.107 | 1.554  | EPHA8   | XM_003642540 |           | EPH receptor A8 [Source:HGNC Symbol;Acc:3391] [ENSGALT00000007554]                                                                          |
| A_87_P053876 | -1.633 | -2.430 | -1.957 | F13A1   | NM_204685    | Gga.226   | Gallus gallus coagulation factor XIII, A1 polypeptide (F13A1), mRNA [NM_204685]                                                             |
| A_87_P127128 | -1.436 | -2.276 | -1.803 | F13A1   | CR407328     | Gga.226   | Gallus gallus coagulation factor XIII, A1 polypeptide (F13A1), mRNA. [Source:RefSeq mRNA;Acc:NM_204685] [ENSGALT00000037229]                |
| A_87_P065516 | 1.090  | -2.723 | -1.492 | FAM132A | BU414164     | Gga.16710 | family with sequence similarity 132, member A [Source:HGNC Symbol;Acc:32308] [ENSGALT00000002876]                                           |
| A_87_P259653 | -1.065 | -2.132 | -1.630 | FAM132A | BU464906     | Gga.51101 | family with sequence similarity 132, member A [Source:HGNC Symbol;Acc:32308] [ENSGALT00000002876]                                           |
| A_87_P013655 | -1.456 | -1.369 | -2.550 | FAM150A | CR391187     | Gga.37597 | Gallus gallus finished cDNA, clone ChEST199k16. [CR391187]                                                                                  |
| A_87_P033146 | -2.501 | 1.082  | -1.660 | FAM168A | BU212749     | Gga.17485 | 603952896F1 CSEQCHN03 Gallus gallus cDNA clone ChEST915p23 5', mRNA sequence [BU212749]                                                     |
| A_87_P078941 | -1.377 | -1.493 | -2.011 | FAM69A  | BU474097     | Gga.31895 | family with sequence similarity 69, member A [Source:HGNC Symbol;Acc:32213] [ENSGALT00000009517]                                            |

|              |        |        |        |          |              |           |                                                                                                                                  |
|--------------|--------|--------|--------|----------|--------------|-----------|----------------------------------------------------------------------------------------------------------------------------------|
| A_87_P277438 | -1.442 | -1.696 | -2.331 | FBXO42   | BX935690     | Gga.53594 | F-box protein 42 [Source:HGNC Symbol;Acc:29249] [ENSGALT00000005919]                                                             |
| A_87_P009222 | 1.841  | 2.196  | 1.159  | FGF4     | NM_001031546 | Gga.32086 | Gallus gallus fibroblast growth factor 4 (FGF4), mRNA [NM_001031546]                                                             |
| A_87_P096701 | 1.201  | 2.033  | -1.266 | FGFR3    | NM_205509    | Gga.14066 | Gallus gallus fibroblast growth factor receptor 3 (FGFR3), mRNA [NM_205509]                                                      |
| A_87_P076271 | 1.451  | -2.821 | 2.021  | FSD2     | XM_004943818 |           | fibronectin type III and SPRY domain containing 2 [Source:HGNC Symbol;Acc:18024] [ENSGALT00000009646]                            |
| A_87_P202863 | 2.666  | -2.430 | 2.617  | FUT9     | NM_001079502 | Gga.29666 | Gallus gallus fucosyltransferase 9 (alpha (1,3) fucosyltransferase) (FUT9), mRNA [NM_001079502]                                  |
| A_87_P058991 | -2.533 | -1.855 | 1.018  | GAL12    | NM_001001607 | Gga.6568  | Gallus gallus beta-defensin 12 (GAL12), mRNA [NM_001001607]                                                                      |
| A_87_P037753 | -1.989 | -2.549 | -3.449 | GATM     | NM_204745    | Gga.1167  | Gallus gallus glycine amidinotransferase (L-arginine:glycine amidinotransferase) (GATM), mRNA [NM_204745]                        |
| A_87_P018823 | 1.139  | 2.033  | 1.872  | GCFC1    | CR338813     | Gga.14840 | PAX3 and PAX7 binding protein 1 [Source:HGNC Symbol;Acc:13579] [ENSGALT00000025680]                                              |
| A_87_P038009 | 2.417  | -1.331 | 1.911  | GLI2     | NM_001271901 | Gga.4969  | Gallus gallus GLI family zinc finger 2 (GLI2), transcript variant 1, mRNA [NM_001271901]                                         |
| A_87_P010784 | 1.865  | 2.942  | 1.956  | GREM1    | NM_204978    | Gga.2961  | Gallus gallus gremlin 1 (GREM1), mRNA [NM_204978]                                                                                |
| A_87_P245603 | -1.208 | -2.019 | 1.079  | GRM3     | XM_416842    |           | glutamate receptor, metabotropic 3 [Source:HGNC Symbol;Acc:4595] [ENSGALT00000010624]                                            |
| A_87_P009177 | -1.227 | -2.372 | -1.066 | GUCA1B   | NM_001007881 | Gga.624   | Gallus gallus guanylate cyclase activator 1B (retina) (GUCA1B), mRNA [NM_001007881]                                              |
| A_87_P063676 | -1.159 | -2.217 | 1.089  | GUCA1B   |              |           | Gallus gallus guanylate cyclase activator 1B (retina) (GUCA1B), mRNA. [Source:RefSeq mRNA;Acc:NM_001007881] [ENSGALT00000035143] |
| A_87_P112253 | 1.537  | 2.488  | 1.299  | GYS1     | AB090806     | Gga.5179  | Gallus gallus GS mRNA for glycogen synthase, partial cds. [AB090806]                                                             |
| A_87_P011151 | 2.005  | -1.026 | 1.360  | HCFC2    | CR524095     | Gga.9676  | Gallus gallus finished cDNA, clone ChEST677h17. [CR524095]                                                                       |
| A_87_P021517 | -1.125 | 2.617  | 8.681  | HDAC11   | NM_001277141 | Gga.11485 | Gallus gallus histone deacetylase 11 (HDAC11), mRNA [NM_001277141]                                                               |
| A_87_P155283 | -1.059 | -2.322 | 1.431  | HDGF     | BU427752     | Gga.17585 | 603959059F1 CSEQRBN09 Gallus gallus cDNA clone ChEST931e16 5', mRNA sequence [BU427752]                                          |
| A_87_P077171 | 1.536  | 2.085  | 1.397  | HES6     | BX935736     | Gga.2703  | Gallus gallus finished cDNA, clone ChEST20g4. [BX935736]                                                                         |
| A_87_P009322 | -2.063 | -1.236 | -1.119 | HMGCS1   | NM_205411    | Gga.4388  | Gallus gallus 3-hydroxy-3-methylglutaryl-CoA synthase 1 (soluble) (HMGCS1), mRNA [NM_205411]                                     |
| A_87_P024637 | -1.215 | -1.677 | -2.207 | HNMT     | NM_001277873 | Gga.10712 | Gallus gallus histamine N-methyltransferase (HNMT), transcript variant 1, mRNA [NM_001277873]                                    |
| A_87_P050016 | -2.063 | -1.610 | -1.855 | HSD17B1  | NM_204837    | Gga.384   | Gallus gallus hydroxysteroid (17-beta) dehydrogenase 1 (HSD17B1), mRNA [NM_204837]                                               |
| A_87_P005649 | -1.529 | -2.016 | -1.636 | HSD17B2  | XM_414168    |           | hydroxysteroid (17-beta) dehydrogenase 2 [Source:HGNC Symbol;Acc:5211] [ENSGALT00000008780]                                      |
| A_87_P052071 | 7.110  | 4.033  | 1.525  | HSP25    | NM_001010842 | Gga.985   | Gallus gallus heat shock protein 25 (HSP25), mRNA [NM_001010842]                                                                 |
| A_87_P293458 | 8.085  | 4.360  | 1.559  | HSP25    | NM_001010842 | Gga.985   | Gallus gallus heat shock protein 25 (HSP25), mRNA [NM_001010842]                                                                 |
| A_87_P057951 | 1.506  | -2.873 | -1.701 | HSP90AA1 | NM_001109785 | Gga.6482  | Gallus gallus heat shock protein 90kDa alpha (cytosolic), class A member 1 (HSP90AA1), mRNA [NM_001109785]                       |

|              |        |        |        |              |              |           |                                                                                                                 |
|--------------|--------|--------|--------|--------------|--------------|-----------|-----------------------------------------------------------------------------------------------------------------|
| A_87_P085771 | 2.030  | -2.706 | -1.645 | HSP90AA1     | NM_001109785 | Gga.6482  | Gallus gallus heat shock protein 90kDa alpha (cytosolic), class A member 1 (HSP90AA1), mRNA [NM_001109785]      |
| A_87_P253769 | 2.421  | -2.769 | -1.748 | HSP90AA1     | NM_001109785 | Gga.6482  | Gallus gallus heat shock protein 90kDa alpha (cytosolic), class A member 1 (HSP90AA1), mRNA [NM_001109785]      |
| A_87_P009402 | 2.312  | 1.155  | -1.697 | HSP90B1      | NM_204289    | Gga.4724  | Gallus gallus heat shock protein 90kDa beta (Grp94), member 1 (HSP90B1), mRNA [NM_204289]                       |
| A_87_P059471 | 2.192  | 1.212  | -1.808 | HSP90B1      | NM_204289    | Gga.4724  | Gallus gallus heat shock protein 90kDa beta (Grp94), member 1 (HSP90B1), mRNA [NM_204289]                       |
| A_87_P107568 | 2.438  | 1.223  | -1.814 | HSP90B1      | NM_204289    | Gga.4724  | Gallus gallus heat shock protein 90kDa beta (Grp94), member 1 (HSP90B1), mRNA [NM_204289]                       |
| A_87_P295368 | 2.531  | 1.352  | -1.518 | HSP90B1      | NM_204289    | Gga.4724  | Gallus gallus heat shock protein 90kDa beta (Grp94), member 1 (HSP90B1), mRNA [NM_204289]                       |
| A_87_P009374 | 2.023  | -1.786 | -1.375 | HSPA5        | NM_205491    | Gga.4219  | Gallus gallus heat shock 70kDa protein 5 (glucose-regulated protein, 78kDa) (HSPA5), mRNA [NM_205491]           |
| A_87_P195928 | 2.074  | -1.848 | -1.416 | HSPA5        | NM_205491    | Gga.4219  | Gallus gallus heat shock 70kDa protein 5 (glucose-regulated protein, 78kDa) (HSPA5), mRNA [NM_205491]           |
| A_87_P195043 | 1.717  | -2.138 | -1.413 | HSPA8        | CR386963     | Gga.4555  | Gallus gallus heat shock 70kDa protein 8 (HSPA8), mRNA. [Source:RefSeq mRNA;Acc:NM_205003] [ENSGALT00000010524] |
| A_87_P197373 | 1.862  | -3.138 | -1.668 | HSPA8        | NM_205003    | Gga.4555  | Gallus gallus heat shock 70kDa protein 8 (HSPA8), mRNA [NM_205003]                                              |
| A_87_P322137 | 1.730  | -2.694 | -1.599 | HSPA8        | NM_205003    | Gga.4555  | Gallus gallus heat shock 70kDa protein 8 (HSPA8), mRNA [NM_205003]                                              |
| A_87_P028311 | 2.974  | 1.590  | 1.629  | HTATIP2      | BU386490     | Gga.5441  | 603583668F1 CSEQCHN75 Gallus gallus cDNA clone ChEST536g18 5', mRNA sequence [BU386490]                         |
| A_87_P026216 | 1.800  | 2.153  | 1.044  | INS          | BU458036     | Gga.673   | 603368994F1 CSEQRBN19 Gallus gallus cDNA clone ChEST272124 5', mRNA sequence [BU458036]                         |
| A_87_P081116 | 1.814  | 2.022  | -1.018 | ITPRIP       | XM_004942269 |           | inositol 1,4,5-trisphosphate receptor interacting protein [Source:HGNC Symbol;Acc:29370] [ENSGALT00000046035]   |
| A_87_P037130 | 1.560  | -2.275 | -1.157 | JMJD6        | NM_001030703 | Gga.21114 | Gallus gallus jumonji domain containing 6 (JMJD6), mRNA [NM_001030703]                                          |
| A_87_P126743 | -1.070 | -1.604 | -2.199 | KERA         | NM_204176    | Gga.4837  | Gallus gallus keratocan (KERA), mRNA [NM_204176]                                                                |
| A_87_P198683 | -1.175 | -2.390 | -3.219 | KERA         | NM_204176    | Gga.4837  | Gallus gallus keratocan (KERA), mRNA [NM_204176]                                                                |
| A_87_P107093 | 1.394  | 2.076  | 1.185  | KIAA1467     | NM_001012812 | Gga.13049 | Gallus gallus KIAA1467 (KIAA1467), mRNA [NM_001012812]                                                          |
| A_87_P152008 | -2.165 | 1.072  | -1.548 | KLHDC8A      | XM_004934932 |           | kelch domain containing 8A [Source:HGNC Symbol;Acc:25573] [ENSGALT00000000967]                                  |
| A_87_P021804 | -2.362 | -1.636 | -2.424 | KLHDC8B      | BX936097     | Gga.2732  | kelch domain containing 8B [Source:HGNC Symbol;Acc:28557] [ENSGALT00000010963]                                  |
| A_87_P299498 | 2.320  | 1.365  | 1.813  | LIN7A        | XM_004937594 |           | lin-7 homolog A (C. elegans) [Source:HGNC Symbol;Acc:17787] [ENSGALT00000017803]                                |
| A_87_P176103 | -2.848 | 1.412  | -1.341 | LMOD1        | XM_004934867 |           | leiomodin 1 (smooth muscle) [Source:HGNC Symbol;Acc:6647] [ENSGALT00000045637]                                  |
| A_87_P023779 | 2.166  | 1.861  | 1.405  | LNX1         | BX931803     | Gga.10912 | Gallus gallus finished cDNA, clone ChEST790g9. [BX931803]                                                       |
| A_87_P077531 | 1.775  | 2.251  | 1.379  | LOC100857766 | CO771112     | Gga.21517 | Uncharacterized protein [Source:UniProtKB/TrEMBL;Acc:F1P116] [ENSGALT00000033325]                               |
| A_87_P061921 | 1.654  | 2.422  | 1.157  | LOC100858410 | XM_004948840 |           | Uncharacterized protein [Source:UniProtKB/TrEMBL;Acc:F1P5I6] [ENSGALT0000003060]                                |

|              |        |        |        |              |              |           |                                                                                                     |
|--------------|--------|--------|--------|--------------|--------------|-----------|-----------------------------------------------------------------------------------------------------|
| A_87_P125568 | -2.273 | -2.176 | -2.309 | LOC100859660 | CR391197     | Gga.44840 | Gallus gallus finished cDNA, clone ChEST208a13. [CR391197]                                          |
| A_87_P015205 | 1.722  | 2.471  | 1.712  | LOC100859899 | CR388828     | Gga.17844 | Gallus gallus finished cDNA, clone ChEST693b1. [CR388828]                                           |
| A_87_P078146 | 2.287  | 2.616  | 1.355  | LOC101750121 | XM_004943583 |           | Uncharacterized protein [Source:UniProtKB/TrEMBL;Acc:F1NE05] [ENSGALT00000032948]                   |
| A_87_P061136 | 1.953  | 2.291  | 2.139  | LOC101751150 | XR_140330    | Gga.499   | Uncharacterized protein [Source:UniProtKB/TrEMBL;Acc:H9L3I9] [ENSGALT00000040574]                   |
| A_87_P013326 | -1.482 | -1.653 | -2.636 | LOC101751760 | CR391626     | Gga.5687  | kinesin family member 2C [Source:HGNC Symbol;Acc:6393] [ENSGALT00000016462]                         |
| A_87_P160658 | 1.222  | -2.038 | 1.148  | LOC419888    | XR_140333    | Gga.25811 | Uncharacterized protein [Source:UniProtKB/TrEMBL;Acc:F1NXG6] [ENSGALT00000003400]                   |
| A_87_P026105 | -1.553 | -2.379 | -2.989 | LOC421123    | BU461157     | Gga.24470 | Uncharacterized protein [Source:UniProtKB/TrEMBL;Acc:R4GK51] [ENSGALT00000044567]                   |
| A_87_P023754 | -1.665 | -2.843 | -3.274 | LOC421560    | BX931884     | Gga.9648  | Gallus gallus finished cDNA, clone ChEST804b19. [BX931884]                                          |
| A_87_P014489 | 2.148  | 2.390  | 1.342  | LOC422872    | CR389926     | Gga.18198 | Gallus gallus finished cDNA, clone ChEST916j2. [CR389926]                                           |
| A_87_P013792 | 2.659  | -1.087 | -1.369 | LOC422887    | CR390999     | Gga.55302 | Gallus gallus finished cDNA, clone ChEST738p23. [CR390999]                                          |
| A_87_P143453 | 3.351  | -1.128 | -1.328 | LOC422887    | CR390999     | Gga.55302 | Gallus gallus finished cDNA, clone ChEST738p23. [CR390999]                                          |
| A_87_P317967 | 1.161  | -2.206 | 1.291  | LOC424523    | XM_422360    |           | Uncharacterized protein [Source:UniProtKB/TrEMBL;Acc:F1P490] [ENSGALT00000010222]                   |
| A_87_P107888 | -2.070 | 1.083  | -1.236 | LOC425137    | NM_001278080 | Gga.38962 | Gallus gallus aldo-keto reductase family 1, member B1-like (LOC425137), mRNA [NM_001278080]         |
| A_87_P013636 | 1.847  | 1.884  | 2.368  | LOC426456    | CR391215     | Gga.18678 | Gallus gallus finished cDNA, clone ChEST206b13. [CR391215]                                          |
| A_87_P068181 | 2.002  | -1.257 | 1.788  | LOC427773    | XM_425344    |           | ectonucleoside triphosphate diphosphohydrolase 2 [Source:HGNC Symbol;Acc:3364] [ENSGALT00000040222] |
| A_87_P023856 | -1.511 | -2.008 | -1.410 | LOC768911    | BX931610     | Gga.7559  | Gallus gallus finished cDNA, clone ChEST400f11. [BX931610]                                          |
| A_87_P055616 | -1.462 | -2.066 | -1.262 | LPAR1        | NM_001115082 | Gga.9756  | Gallus gallus lysophosphatidic acid receptor 1 (LPAR1), mRNA [NM_001115082]                         |
| A_87_P080671 | -1.073 | -2.017 | 1.309  | LRRC18       | XM_004942134 |           | leucine rich repeat containing 18 [Source:HGNC Symbol;Acc:23199] [ENSGALT00000009958]               |
| A_87_P302368 | 1.581  | -2.088 | 1.435  | LRRC72       | XM_418694    |           | leucine rich repeat containing 72 [Source:HGNC Symbol;Acc:42972] [ENSGALT00000017565]               |
| A_87_P115443 | 2.175  | 1.083  | -1.048 | MAPT         | NM_001199193 | Gga.15322 | Gallus gallus microtubule-associated protein tau (MAPT), mRNA [NM_001199193]                        |
| A_87_P199993 | -1.662 | -1.350 | -2.342 | MB           | NM_001167752 | Gga.1960  | Gallus gallus myoglobin (MB), mRNA [NM_001167752]                                                   |
| A_87_P011904 | -1.388 | -2.601 | -3.484 | MED22        | CR523011     | Gga.42364 | Gallus gallus finished cDNA, clone ChEST795b24. [CR523011]                                          |
| A_87_P251453 | -1.549 | -3.262 | -5.174 | MED22        | CR523011     | Gga.42364 | Gallus gallus finished cDNA, clone ChEST795b24. [CR523011]                                          |
| A_87_P312677 | -1.116 | -1.553 | -2.039 | MED22        | NM_001045830 | Gga.42364 | Gallus gallus mediator complex subunit 22 (MED22), mRNA [NM_001045830]                              |
| A_87_P011656 | -1.081 | -1.328 | -2.628 | MEGF11       | CR523376     | Gga.11013 | Gallus gallus finished cDNA, clone ChEST876f13. [CR523376]                                          |
| A_87_P062896 | -1.388 | -2.819 | 1.052  | MEOX1        | NM_204765    | Gga.288   | Gallus gallus mesenchyme homeobox 1 (MEOX1), mRNA [NM_204765]                                       |
| A_87_P013958 | -1.957 | -2.658 | -1.244 | MOGAT2       | CR390740     | Gga.37179 | Uncharacterized protein [Source:UniProtKB/TrEMBL;Acc:F1NZ99] [ENSGALT00000022919]                   |
| A_87_P121398 | -1.007 | 1.919  | 3.405  | MRGPRH       | CR385967     | Gga.15061 | Gallus gallus finished cDNA, clone ChEST239e19. [CR385967]                                          |
| A_87_P024179 | -1.911 | -3.490 | -1.400 | MRRF         | BX930788     | Gga.7262  | mitochondrial ribosome recycling factor [Source:HGNC Symbol;Acc:7234] [ENSGALT0000002038]           |

|              |        |        |        |        |              |           |                                                                                                                      |
|--------------|--------|--------|--------|--------|--------------|-----------|----------------------------------------------------------------------------------------------------------------------|
| A_87_P008812 | 1.295  | 2.083  | 1.309  | MST1   | NM_205213    | Gga.670   | Gallus gallus macrophage stimulating 1 (hepatocyte growth factor-like) (MST1), mRNA [NM_205213]                      |
| A_87_P075246 | -2.175 | 2.108  | -3.131 | MVD    | CR338929     | Gga.48999 | mevalonate (diphospho) decarboxylase [Source:HGNC Symbol;Acc:7529] [ENSGALT00000011769]                              |
| A_87_P200998 | -2.184 | 1.015  | -2.615 | MVD    | CR338929     | Gga.48999 | mevalonate (diphospho) decarboxylase [Source:HGNC Symbol;Acc:7529] [ENSGALT00000011769]                              |
| A_87_P009195 | -2.123 | -1.025 | -1.458 | MYH15  | NM_204766    | Gga.2617  | Gallus gallus myosin, heavy chain 15 (MYH15), mRNA [NM_204766]                                                       |
| A_87_P108978 | -2.049 | 1.055  | -1.319 | MYH15  | NM_204766    | Gga.2617  | Gallus gallus myosin, heavy chain 15 (MYH15), mRNA [NM_204766]                                                       |
| A_87_P053486 | -1.701 | -2.199 | -2.175 | MYL1   | NM_001044632 | Gga.4835  | Gallus gallus myosin, light chain 1, alkali; skeletal, fast (MYL1), mRNA [NM_001044632]                              |
| A_87_P009549 | -1.631 | -3.131 | -2.682 | MYL4   | J02823       | Gga.21937 | myosin, light chain 4, alkali; atrial, embryonic [Source:HGNC Symbol;Acc:7585] [ENSGALT00000000816]                  |
| A_87_P157248 | -1.673 | -3.265 | -2.888 | MYL4   | J02823       | Gga.21937 | myosin, light chain 4, alkali; atrial, embryonic [Source:HGNC Symbol;Acc:7585] [ENSGALT00000000816]                  |
| A_87_P023086 | -1.984 | -1.967 | -3.316 | MYO3A  | BX933331     | Gga.10560 | Gallus gallus finished cDNA, clone ChEST192m15. [BX933331]                                                           |
| A_87_P095916 | -2.021 | -1.245 | 1.014  | NHEDC2 | CR387753     | Gga.16446 | Uncharacterized protein [Source:UniProtKB/TrEMBL;Acc:E1C3V4] [ENSGALT00000020128]                                    |
| A_87_P024019 | -1.611 | -1.801 | -2.457 | NMNAT3 | BX931202     | Gga.11021 | nicotinamide nucleotide adenyltransferase 3 [Source:HGNC Symbol;Acc:20989] [ENSGALT00000046024]                      |
| A_87_P110323 | 1.668  | -1.335 | -2.185 | NMS    | XM_004938552 |           | Uncharacterized protein [Source:UniProtKB/TrEMBL;Acc:F1NR12] [ENSGALT00000041350]                                    |
| A_87_P144413 | 1.236  | -2.343 | 1.429  | NR1I3  | NM_204702    | Gga.237   | Gallus gallus nuclear receptor subfamily 1, group I, member 3 (NR1I3), mRNA [NM_204702]                              |
| A_87_P124353 | 1.566  | 2.115  | 1.470  | NRAS   | NM_001012549 | Gga.22051 | Gallus gallus neuroblastoma RAS viral (v-ras) oncogene homolog (NRAS), mRNA [NM_001012549]                           |
| A_87_P226148 | 1.702  | -2.142 | 1.576  | NT5C1A | BU411420     | Gga.8058  | 5'-nucleotidase, cytosolic IA [Source:HGNC Symbol;Acc:17819] [ENSGALT00000006051]                                    |
| A_87_P011916 | -1.222 | 2.163  | 1.539  | ORAOV1 | NM_001031186 | Gga.22117 | Gallus gallus oral cancer overexpressed 1 (ORAOV1), mRNA [NM_001031186]                                              |
| A_87_P055531 | -1.175 | 2.049  | 1.592  | ORAOV1 | NM_001031186 | Gga.22117 | Gallus gallus oral cancer overexpressed 1 (ORAOV1), mRNA [NM_001031186]                                              |
| A_87_P129473 | -1.221 | -1.384 | -2.317 | OSTN   | NM_001098608 | Gga.13448 | Gallus gallus osteocrin (OSTN), mRNA [NM_001098608]                                                                  |
| A_87_P037755 | -2.508 | -1.988 | -3.200 | OTOR   | NM_204732    | Gga.263   | Gallus gallus otoraplin (OTOR), mRNA [NM_204732]                                                                     |
| A_87_P034873 | 1.630  | 2.169  | 1.334  | OVALX  | NM_001276386 |           | Gallus gallus ovalbumin-related protein X (SERPINB14C) (OVALX), mRNA [NM_001276386]                                  |
| A_87_P065251 | -2.251 | 1.036  | -1.466 | PADI1  | AB842273     |           | Peptidylarginine deiminase type I; Uncharacterized protein [Source:UniProtKB/TrEMBL;Acc:E1C0W6] [ENSGALT00000000655] |
| A_87_P097016 | -1.357 | -1.878 | -2.084 | PAPOLG | XM_004940117 |           | poly(A) polymerase gamma [Source:HGNC Symbol;Acc:14982] [ENSGALT00000012751]                                         |
| A_87_P080016 | 2.084  | -1.480 | 1.246  | PCDH15 | DQ354419     | Gga.27533 | Gallus gallus protocadherin-15-CD1 isoform 1 mRNA, complete cds. [DQ354419]                                          |
| A_87_P019799 | -1.422 | -1.684 | -2.481 | PCP4   | NM_001278148 | Gga.7397  | Gallus gallus Purkinje cell protein 4 (PCP4), mRNA [NM_001278148]                                                    |
| A_87_P175983 | 2.135  | 2.432  | 1.314  | PDC    | XM_004943303 |           | phosducin [Source:HGNC Symbol;Acc:8759] [ENSGALT00000008131]                                                         |
| A_87_P038145 | 2.975  | -2.484 | 3.053  | PIT54  | NM_207180    | Gga.1164  | Gallus gallus PIT54 protein (PIT54), mRNA [NM_207180]                                                                |
| A_87_P055601 | 1.067  | -2.175 | 1.413  | PLP1   | NM_205277    | Gga.1803  | Gallus gallus proteolipid protein 1 (PLP1), mRNA [NM_205277]                                                         |
| A_87_P095531 | 2.157  | 1.526  | 1.160  | PPM1K  |              |           | Uncharacterized protein [Source:UniProtKB/TrEMBL;Acc:F1P138] [ENSGALT00000018387]                                    |



|              |        |        |        |          |              |           |                                                                                                                                                                                                 |
|--------------|--------|--------|--------|----------|--------------|-----------|-------------------------------------------------------------------------------------------------------------------------------------------------------------------------------------------------|
| A_87_P093606 | -1.271 | 3.107  | 1.395  | PRDM6    | XM_424413    |           | PR domain containing 6 [Source:HGNC Symbol;Acc:9350] [ENSGALT00000008588]                                                                                                                       |
| A_87_P170038 | 1.736  | 2.384  | 1.144  | PRDX4    | DR417601     | Gga.34481 | gPGC_EST07443 Embryonic gonadal PGC cDNA Library Gallus gallus cDNA 5', mRNA sequence [DR417601]                                                                                                |
| A_87_P063281 | -2.190 | 1.477  | 1.514  | PTPN7    | XM_001232668 | Gga.28324 | protein tyrosine phosphatase, non-receptor type 7 [Source:HGNC Symbol;Acc:9659] [ENSGALT0000000839]                                                                                             |
| A_87_P270878 | -1.233 | -2.156 | -1.331 | RBMX     | NM_001079728 | Gga.21807 | Gallus gallus RNA binding motif protein, X-linked (RBMX), mRNA [NM_001079728]                                                                                                                   |
| A_87_P116733 | -1.265 | -2.130 | 1.228  | RFXDC2   | BX934393     | Gga.12663 | regulatory factor X, 7 [Source:HGNC Symbol;Acc:25777] [ENSGALT0000001028]                                                                                                                       |
| A_87_P078541 | -1.141 | -2.115 | -1.029 | RGS16    | NM_001277544 |           | Gallus gallus regulator of G-protein signaling 16 (RGS16), mRNA [NM_001277544]                                                                                                                  |
| A_87_P104343 | -1.774 | -3.067 | 1.390  | RGS20    | NM_204842    | Gga.352   | Gallus gallus regulator of G-protein signaling 20 (RGS20), mRNA [NM_204842]                                                                                                                     |
| A_87_P154873 | 1.753  | 2.005  | 1.542  | RNF152   | XM_004939697 |           | E3 ubiquitin-protein ligase RNF152 [Source:UniProtKB/Swiss-Prot;Acc:E1C2W7] [ENSGALT00000043782]                                                                                                |
| A_87_P146108 | 2.113  | 2.335  | 1.383  | RPL6     | DR416206     | Gga.3486  | gPGC_EST06048 Embryonic gonadal PGC cDNA Library Gallus gallus cDNA 5', mRNA sequence [DR416206]                                                                                                |
| A_87_P070641 | -2.271 | -1.714 | -2.211 | RSPO4    | AB690565     | Gga.55711 | R-spondin 4 [Source:HGNC Symbol;Acc:16175] [ENSGALT00000039389]                                                                                                                                 |
| A_87_P117374 | 1.572  | -2.118 | -1.266 | RSRP1    | BX935301     | Gga.1137  | Gallus gallus finished cDNA, clone ChEST959g23. [BX935301]                                                                                                                                      |
| A_87_P009018 | -1.210 | -2.016 | -1.424 | S100A11  | NM_205166    | Gga.639   | Gallus gallus S100 calcium binding protein A11 (S100A11), mRNA [NM_205166]                                                                                                                      |
| A_87_P056551 | -1.212 | -2.061 | -1.466 | S100A11  | NM_205166    | Gga.639   | Gallus gallus S100 calcium binding protein A11 (S100A11), mRNA [NM_205166]                                                                                                                      |
| A_87_P064056 | 1.696  | 2.009  | 1.029  | SCMH1    | XM_001232076 |           | sex comb on midleg homolog 1 (Drosophila) [Source:HGNC Symbol;Acc:19003] [ENSGALT0000000949]                                                                                                    |
| A_87_P095371 | -2.113 | -1.053 | -1.644 | SCRG1    | XM_420523    |           | stimulator of chondrogenesis 1 [Source:HGNC Symbol;Acc:17036] [ENSGALT00000017493]                                                                                                              |
| A_87_P011946 | 1.208  | -2.317 | 1.767  | SDC3     | CR522958     | Gga.20152 | Gallus gallus syndecan 3 (SDC3), mRNA. [Source:RefSeq mRNA;Acc:NM_205383] [ENSGALT0000000793]                                                                                                   |
| A_87_P021044 | 2.006  | -2.262 | 1.801  | SEMA5B   | XM_422096    | Gga.31259 | sema domain, seven thrombospondin repeats (type 1 and type 1-like), transmembrane domain (TM) and short cytoplasmic domain, (semaphorin) 5B [Source:HGNC Symbol;Acc:10737] [ENSGALT00000019105] |
| A_87_P138443 | 2.123  | 1.153  | -1.681 | SERPINH1 | NM_205291    | Gga.4168  | Gallus gallus serpin peptidase inhibitor, clade H (heat shock protein 47), member 1, (collagen binding protein 1) (SERPINH1), mRNA [NM_205291]                                                  |
| A_87_P216583 | 2.261  | 1.073  | -1.461 | SERPINH1 | NM_205291    | Gga.4168  | Gallus gallus serpin peptidase inhibitor, clade H (heat shock protein 47), member 1, (collagen binding protein 1) (SERPINH1), mRNA [NM_205291]                                                  |
| A_87_P093966 | 1.149  | 2.018  | 1.181  | SESN2    | BU407331     | Gga.55126 | Uncharacterized protein [Source:UniProtKB/TrEMBL;Acc:F1NGI3] [ENSGALT00000009061]                                                                                                               |
| A_87_P071421 | -1.378 | -2.171 | -1.272 | SHMT1    | XM_004945202 |           | serine hydroxymethyltransferase 1 (soluble) [Source:HGNC Symbol;Acc:10850] [ENSGALT00000008093]                                                                                                 |
| A_87_P023775 | 1.412  | 2.344  | 1.110  | SLC5A11  | BX931813     | Gga.50802 | solute carrier family 5 (sodium/inositol cotransporter), member 11 [Source:HGNC Symbol;Acc:23091] [ENSGALT00000009548]                                                                          |
| A_87_P021800 | -1.501 | -1.426 | -2.403 | SNCA     | NM_204673    | Gga.2726  | Gallus gallus synuclein, alpha (non A4 component of amyloid precursor) (SNCA), mRNA [NM_204673]                                                                                                 |
| A_87_P037801 | 1.336  | 2.112  | 1.411  | SOX14    | NM_204761    | Gga.286   | Gallus gallus SRY (sex determining region Y)-box 14 (SOX14), mRNA [NM_204761]                                                                                                                   |
| A_87_P086866 | -2.388 | 1.121  | -1.859 | SPEG     | BU236587     | Gga.27820 | SPEG complex locus [Source:HGNC Symbol;Acc:16901] [ENSGALT00000043042]                                                                                                                          |

|              |        |        |        |          |              |           |                                                                                                                            |
|--------------|--------|--------|--------|----------|--------------|-----------|----------------------------------------------------------------------------------------------------------------------------|
| A_87_P031536 | -1.014 | -2.058 | -2.041 | SPTBN5   | BU255435     | Gga.6162  | spectrin, beta, non-erythrocytic 5 [Source:HGNC Symbol;Acc:15680] [ENSGALT00000014533]                                     |
| A_87_P014649 | -1.207 | 2.061  | 1.198  | SRSF5    | NM_001031197 | Gga.4502  | Gallus gallus serine/arginine-rich splicing factor 5 (SRSF5), mRNA [NM_001031197]                                          |
| A_87_P124158 | -1.212 | 2.219  | 1.253  | SRSF5    | NM_001031197 | Gga.4502  | Gallus gallus serine/arginine-rich splicing factor 5 (SRSF5), mRNA [NM_001031197]                                          |
| A_87_P079586 | 3.140  | 1.945  | 2.109  | TACSTD2  | NM_001277676 |           | Gallus gallus tumor-associated calcium signal transducer 2 (TACSTD2), mRNA [NM_001277676]                                  |
| A_87_P098601 | -1.778 | -1.869 | -2.999 | TCP10    | XM_419608    |           | Uncharacterized protein [Source:UniProtKB/TrEMBL;Acc:F1NVN7] [ENSGALT00000018514]                                          |
| A_87_P098116 | -2.103 | 1.058  | -1.382 | TCTE1    | XM_004935389 |           | t-complex-associated-testis-expressed 1 [Source:HGNC Symbol;Acc:11693] [ENSGALT00000016530]                                |
| A_87_P003295 | 1.170  | 1.399  | 2.496  | TIMM50   | XM_001233750 |           | translocase of inner mitochondrial membrane 50 homolog (S. cerevisiae) [Source:HGNC Symbol;Acc:23656] [ENSGALT00000044658] |
| A_87_P132678 | 1.142  | 3.762  | 1.666  | TLR1LA   | NM_001007488 | Gga.22623 | Gallus gallus toll-like receptor 1-like A (TLR1LA), mRNA [NM_001007488]                                                    |
| A_87_P129588 | 1.537  | 2.529  | 1.393  | TLR4     | NM_001030693 | Gga.32116 | Gallus gallus toll-like receptor 4 (TLR4), mRNA [NM_001030693]                                                             |
| A_87_P170453 | -2.036 | -1.313 | -1.516 | TMEM194A | XM_001232566 |           | transmembrane protein 194A [Source:HGNC Symbol;Acc:29001] [ENSGALT00000000664]                                             |
| A_87_P064916 | 1.283  | -2.107 | 1.584  | TRIM29   | XM_417892    |           | tripartite motif containing 29 [Source:HGNC Symbol;Acc:17274] [ENSGALT00000010874]                                         |
| A_87_P024599 | -1.442 | 4.836  | -1.586 | TRIM65   | BX929756     | Gga.10224 | Gallus gallus finished cDNA, clone ChEST791p15. [BX929756]                                                                 |
| A_87_P035266 | -1.141 | 1.465  | -2.063 | TRPC3    | AY130981     | Gga.106   | Gallus gallus transient receptor potential protein mRNA, partial cds. [AY130981]                                           |
| A_87_P265968 | -2.034 | 1.205  | -1.690 | TSTA3    | NM_001277448 | Gga.48657 | Gallus gallus tissue specific transplantation antigen P35B (TSTA3), mRNA [NM_001277448]                                    |
| A_87_P071201 | -1.217 | -1.592 | -2.204 | UNCX     | XM_414766    |           | UNC homeobox [Source:HGNC Symbol;Acc:33194] [ENSGALT00000041002]                                                           |
| A_87_P035138 | -1.122 | -2.160 | -1.049 | UTS2     | NM_206990    | Gga.14388 | Gallus gallus urotensin 2 (UTS2), mRNA [NM_206990]                                                                         |
| A_87_P067151 | -2.158 | 1.034  | -1.535 | UTS2R    | XM_004946093 |           | urotensin 2 receptor [Source:HGNC Symbol;Acc:4468] [ENSGALT00000002482]                                                    |
| A_87_P036253 | 2.844  | -1.179 | 1.562  | XPO1     | AJ720676     | Gga.24191 | Gallus gallus mRNA for hypothetical protein, clone 23d16. [AJ720676]                                                       |
| A_87_P065011 | 1.341  | 2.053  | 1.150  | ZBTB16   | CR523202     | Gga.17584 | zinc finger and BTB domain containing 16 [Source:HGNC Symbol;Acc:12930] [ENSGALT00000011346]                               |

# For comparison between the CTL and heat-stressed groups, gene expressions with more than two-fold changes (up or down) were considered as significantly different ( $P < 0.05$ ).

Supplementary Table S2. The differentially expressed proteins in SYFs of layer-type L2 strain Taiwan country chickens after acute heat stress.

| Spot No. | Average ratio <sup>a</sup> |      |      | Protein identity                                                  | GenBank accession | Gene symbol | MALDI-MS PMF <sup>b</sup> | Theoretical Mr/pI | Score (TOF/TOF- MALDI-MS/MS LIFT Peptide) |                       |                        |
|----------|----------------------------|------|------|-------------------------------------------------------------------|-------------------|-------------|---------------------------|-------------------|-------------------------------------------|-----------------------|------------------------|
|          | R0/C                       | R2/C | R6/C |                                                                   |                   |             |                           |                   | TOF)                                      | MALDI-MS/MS LIFT      | Peptide                |
| 52       | -1.43                      | 1.70 | 1.37 | heat shock protein 108                                            | gi 211943         | HSP108      | 34/185 (46)               | 91726/4.68        | 131/397                                   |                       |                        |
| 95       | 1.13                       | 1.62 | 1.84 | vitellogenin I<br>Chain A, Crystal Structure Of Aluminum-Bound    | gi 1871444        | VTG1        | 44/219 (27)               | 212608/9.9        | 76/57                                     | 1 (57)                | R.YLLDLLPAAASHR.S      |
| 129      | -1.14                      | 1.58 | 1.35 | Ovotransferrin At 2.15 Angstrom Resolution                        | gi 83754919       |             | 29/134 (57)               | 77518/6.8         | 185/96                                    | 2 (67, 54)            | R.SAGWNIPIGTLIHR.G     |
| 162      | 1.25                       | 1.62 | 1.53 | vitellogenin I                                                    | gi 1871444        | VTG1        | 45/205 (28)               | 212608/9.9        | 105/124                                   | 2 (89, 61)            | R.YLLDLLPAAASHR.S      |
| 182      | -1.40                      | 2.30 | 1.49 | 78 kDa glucose-regulated protein precursor                        | gi 45382769       | GRP78       | 36/206 (53)               | 72088/4.98        | 196/450                                   | 4 (87, 151, 154, 145) | R.ITPSYVAFTPEGER.L     |
| 184      | -1.29                      | 2.13 | 1.51 | 78 kDa glucose-regulated protein precursor                        | gi 45382769       | GRP78       | 8/11 (47)                 | 72088/4.98        | 174/367                                   | 4 (67, 78, 130, 182)  | R.VEIIANDQGNR.I        |
| 192      | -1.22                      | 1.58 | 1.06 | lamin-A                                                           | gi 45384214       | LOC396224   | 26/152 (41)               | 73348/6.52        | 136/NS                                    | NS                    | R.AVPATEFEVTTAVLPEER.T |
| 194      | -1.21                      | 1.55 | 1.42 | heat shock cognate 70                                             | gi 2996407        | hsc70       | 24/195 (47)               | 71868/5.42        | 79/54                                     | 1 (54)                | R.FEELNADLFR.G         |
| 199      | -1.13                      | 1.51 | 1.23 | serum albumin precursor                                           | gi 45383974       | ALB         | 24/157 (65)               | 71868/5.42        | 65/NS                                     | NS                    | K.NQGSWGTGGNIR.T       |
| 200      | -1.08                      | 2.06 | 1.55 | heat shock cognate 70                                             | gi 2996407        | hsc70       | 24/163 (45)               | 71077/5.35        | 95/160                                    | 2 (26, 161)           | R.TTPSYVAFTDTER.L      |
| 206      | 1.16                       | 1.86 | 1.38 | heat shock protein 70<br>Chain N, Avian Mitochondrial Respiratory | gi 421931777      | HSP70       | 23/177 (40)               | 70098/5.55        | 68/60                                     | 2 (57, 30)            | R.FEELNADLFR.G         |
| 209      | 1.32                       | 1.68 | 1.30 | Complex Ii At 1.8 Angstrom Resolution                             | gi 110590578      |             | 26/224 (58)               | 69098/6.2         | 111/173                                   | 3 (59, 87, 85)        | R.TGHSLLTLYGR.S        |
| 213      | -1.15                      | 2.05 | 1.47 | heat shock cognate 70                                             | gi 2996407        | hsc70       | 30/163 (50)               | 71011/5.35        | 129/215                                   | 3 (43, 61, 167)       | R.TTPSYVAFTDTER.L      |
| 216      | -1.03                      | 1.51 | 1.39 | heat shock protein 75 kDa, mitochondrial                          | gi 57525126       | TRAP1       | 31/200 (44)               | 80082/6.7         | 102/103                                   | 3 (51, 38, 73)        | R.FIAQAYDKPR.Y         |
| 220      | 1.25                       | 1.87 | 1.41 | heat shock cognate 70                                             | gi 2996407        | hsc70       | 16/173 (36)               | 71011/5.35        | 75/63                                     | 1 (63)                | R.FEELNADLFR.G         |
| 221      | 1.08                       | 2.24 | 1.57 | heat shock protein 70                                             | gi 421931777      | HSP70       | 37/208 (59)               | 70098/5.5         | 140/172                                   | 3 (80, 69, 86)        | R.FEELNADLFR.G         |
| 235      | 1.06                       | 2.27 | 1.52 | heat shock protein 70                                             | gi 421931777      | HSP70       | 21/73 (34)                | 70098/5.5         | 165/139                                   | 3 (47, 29, 116)       | R.ARFEELNADLFR.G       |
| 239      | -1.15                      | 1.88 | 1.50 | heat shock protein 70                                             | gi 421931777      | HSP70       | 23/185 (35)               | 70098/5.5         | 93/79                                     | 1 (79)                | K.GQIQEIVLVGGSTR.I     |
| 248      | -1.06                      | 1.91 | 1.48 | stress-70 protein, mitochondrial precursor                        |                   | HSPA9       | 28/174 (48)               | 73432/6.05        | 114/134                                   | 3 (63, 55, 76)        | K.VQQTVDLFR.A          |
| 253      | -1.13                      | 2.19 | 1.64 | stress-70 protein, mitochondrial precursor                        | gi 57524986       | HSPA9       | 25/92 (47)                | 73432/6           | 154/115                                   | 3 (5, 79, 67)         | R.TTPSVVAFTADGER.L     |
| 282      | -1.08                      | 1.79 | 1.66 | EH domain-containing protein 3                                    | gi 71895641       | EHD3        | 33/167 (63)               | 60914/6.2         | 152/128                                   | 2 (69, 89)            | K.LNAFGNAFLNR.F        |
| 289      | -1.04                      | 1.74 | 1.36 | vitellogenin                                                      | gi 50582493       | VTG         | 33/105 (32)               | 163656/10.1       | 120/NS                                    | NS                    | R.VDGPILIFFADYR.I      |
| 293      | -1.10                      | 1.94 | 1.38 | T-complex protein 1 subunit epsilon                               | gi 60302774       | CCT5        | 30/199 (64)               | 60190/5.4         | 102/117                                   | 3 (65, 60, 52)        | R.SLHDALCVIR.N         |

|     |       |      |      |                                                    |              |        |             |             |         |                   |                       |
|-----|-------|------|------|----------------------------------------------------|--------------|--------|-------------|-------------|---------|-------------------|-----------------------|
| 300 | 1.66  | 2.14 | 1.53 | 60 kDa heat shock protein, mitochondrial precursor | gi 61098372  | HSPD1  | 25/201 (43) | 61105/5.6   | 92/320  | 3 (99, 143, 139)  | R.AAVEEGIVPGGGCALLR.C |
| 302 | -1.12 | 1.50 | 1.40 | ankyrin 3, node of Ranvier (ankyrin G)             | gi 459642348 | ANK3   | 44/111 (14) | 477667/6    | 74/NS   | NS                | R.LYGPTNFSPINHVAR.F   |
|     |       |      |      | PREDICTED: cytoskeleton-associated protein 4,      |              |        |             |             |         |                   |                       |
| 303 | -1.02 | 1.54 | 1.34 | partial                                            | gi 513159594 | CKAP4  | 9/28 (21)   | 54564/4.8   | 77/125  | 2 (28, 98)        | K.FNSVEGSVDEL.R.S     |
| 312 | 1.33  | 2.45 | 1.71 | 60 kDa heat shock protein, mitochondrial precursor | gi 61098372  | HSPD1  | 31/187 (55) | 61105/5.6   | 136/396 | 3 (121, 135, 203) | R.AAVEEGIVPGGGCALLR.C |
| 319 | -1.18 | 2.57 | 1.77 | 60 kDa heat shock protein, mitochondrial precursor | gi 61098372  | HSPD1  | 35/194 (61) | 61105/5.6   | 183/431 | 3 (132, 159, 202) | R.AAVEEGIVPGGGCALLR.C |
| 330 | -1.17 | 1.53 | 1.36 | apolipoprotein B                                   | gi 102221132 | APOB   | 81/222 (22) | 524519/8.99 | 83/204  | 3 (72, 61, 126)   | R.IPHTVTAPTFGK.L      |
| 333 | -1.26 | 1.55 | 1.45 | apolipoprotein B                                   | gi 102221132 | APOB   | 61/144 (16) | 524519/8.99 | 79/64   | 2 (62, 25)        | R.IPHTVTAPTFGK.L      |
| 341 | -1.18 | 1.70 | 1.43 | T-complex protein 1 subunit eta                    | gi 71895883  | CCT7   | 28/210 (58) | 60881/5.9   | 92/148  | 2 (79, 70)        | K.LPIGDVATQYFADR.D    |
| 353 | 1.1   | 1.9  | 1.35 | T-complex protein 1 subunit theta                  | gi 52138673  | CCT8   | 33/156 (51) | 60017/5.24  | 167/109 | 2 (100, 41)       | K.HYSGLEEAVYR.N       |
| 362 | -1.13 | 1.82 | 1.36 | T-complex protein 1 subunit alpha                  | gi 57530301  | TCP1   | 35/101 (63) | 61056/5.6   | 136/150 | 3 (43, 38, 119)   | K.FATEAAITLR.I        |
| 372 | 1.00  | 1.81 | 1.54 | T-complex protein 1 subunit beta                   | gi 60302718  | CCT2   | 37/169 (65) | 57737/5.9   | 180/76  | 2 (43, 61)        | K.IHPQTIIAGWR.A       |
| 382 | -1.32 | 2.07 | 1.69 | protein disulfide-isomerase A3 precursor           | gi 45383890  | PDIA3  | 30/145 (51) | 56546/5.68  | 195/114 | 3 (21, 34, 112)   | K.FVMQEEFSR.D         |
| 398 | -1.26 | 2.39 | 1.83 | protein disulfide-isomerase A3 precursor           | gi 45383890  | PDIA3  | 30/170 (55) | 56546/5.68  | 196/138 | 3 (56, 29, 101)   | K.FVMQEEFSR.D         |
|     |       |      |      | Chain E, Crystal Structure Of Native Chicken       |              |        |             |             |         |                   |                       |
| 402 | 1.73  | 2.08 | 1.58 | Fibrinogen With Two Different Bound Ligands        | gi 21730887  |        | 30/189 (67) | 53400/7.7   | 123/NS  | NS                | K.EDGGGWYNR.C         |
|     |       |      |      | PREDICTED: A-kinase anchor protein 9 isoform       |              |        |             |             |         |                   |                       |
| 406 | 1.46  | 2.02 | 1.45 | X22                                                | gi 513193274 | PCNT   | 48/153 (15) | 481664/5    | 86/NS   | NS                | R.ELGLQEDNPGVYNGR.W   |
| 409 | 1.48  | 1.64 | 1.34 | fibrinogen beta chain, partial                     | gi 211780    |        | 24/181 (60) | 53272/7.7   | 132/152 | 3 (45, 90, 74)    | K.EDGGGWYNR.C         |
|     |       |      |      | PREDICTED: aldehyde dehydrogenase,                 |              |        |             |             |         |                   |                       |
| 411 | 1.02  | 1.89 | 1.51 | mitochondrial isoform X3                           | gi 513210248 | ALDH2  | 27/202 (56) | 60459/8.5   | 134/130 | 2 (79, 79)        | K.TIPLDGDFFCYTR.H     |
| 412 | 1.25  | 2.04 | 1.60 | fibrinogen beta chain, partial                     | gi 211780    |        | 27/193 (66) | 53272/7.69  | 106/83  | 2 (41, 69)        | K.EDGGGWYNR.C         |
| 415 | 1.07  | 2.17 | 1.63 | tubulin alpha                                      | gi 223280    |        | 17/165 (50) | 46259/4.86  | 133/273 | 3 (126, 35, 171)  | R.AVFDLEPTVIDEVR.T    |
| 418 | 1.41  | 1.66 | 1.48 | recombination activating protein 1                 | gi 4973167   | RAG-1  | 21/162 (22) | 112660/9.6  | 60/NS   | NS                | K.EDGGGWYNR.C         |
| 426 | 1.08  | 1.86 | 1.55 | RecName: Full=Tubulin alpha-1 chain                | gi 135393    | TUBA1C | 19/142 (51) | 46259/4.86  | 156/126 | 2 (126, 19)       | R.AVFDLEPTVIDEVR.T    |
| 427 | -1.05 | 2.16 | 1.63 | RecName: Full=Tubulin alpha-1 chain                | gi 135393    | TUBA1C | 17/158 (47) | 46259/4.86  | 132/223 | 3 (107,129,44)    | R.LIGQIVSSITASLR.F    |
|     |       |      |      | PREDICTED: cytoskeleton-associated protein 4,      |              |        |             |             |         |                   |                       |
| 430 | 1.31  | 1.87 | 1.66 | partial                                            | gi 513159594 | CKAP4  | 26/175 (56) | 54564/4.8   | 101/173 | 3 (80, 55, 102)   | K.FNSVEGSVDEL.R.S     |

|     |       |      |      |                                                                                         |              |          |              |            |         |                     |                                 |
|-----|-------|------|------|-----------------------------------------------------------------------------------------|--------------|----------|--------------|------------|---------|---------------------|---------------------------------|
|     |       |      |      |                                                                                         |              |          |              |            |         |                     | R.SYELAGGSLGGLLEALDSMGLR.G      |
| 433 | -1.3  | 1.82 | 1.81 | tubulin beta-3 chain                                                                    | gi 153792017 | TUBB4B   | 17/87 (30)   | 50285/4.6  | 90/NS   | NS                  | + Oxidation (M)                 |
| 434 | -1.25 | 1.82 | 1.54 | keratin, type II cytoskeletal cochlear                                                  | gi 45384378  | KRT7     | 36/135 (57)  | 53770/5.86 | 215/131 | 3 (12, 102, 58)     | R.ISLGGSSSYSVR.S                |
| 436 | -1.14 | 1.72 | 1.63 | PREDICTED: keratin, type II cytoskeletal 8                                              | gi 513233477 | KRT8     | 26/128 (63)  | 40680/4.8  | 138/133 | 3 (64, 61, 73)      | R.GLFEGYVGTLR.R                 |
| 439 | -1.10 | 1.71 | 1.49 | keratin, type II cytoskeletal cochlear                                                  | gi 45384378  | KRT7     | 31/144 (55)  | 53770/5.9  | 153/67  | 2 (67, 4)           | K.VDALTDEINFLR.S                |
| 440 | -1.03 | 1.69 | 1.35 | selenium-binding protein 1<br>succinyl-CoA:3-ketoacid-coenzyme A transferase 1,         | gi 480540318 | SELENBP1 | 19/198 (48)  | 53098/6.2  | 84/89   | 1 (66)              | K.LVGQVFLGGSIVR.G               |
| 445 | -1.02 | 2.04 | 1.42 | mitochondrial                                                                           | gi 60592998  | OXCT1    | 12/84 (36)   | 56549/8.9  | 44/30   | 1 (30)              | R.MVSSYVGENAEFER.Q              |
| 446 | 1.08  | 1.80 | 1.43 | ATP synthase subunit alpha, mitochondrial isoform<br>PREDICTED: aldehyde dehydrogenase, | gi 363745506 | ATP5A1W  | 18/183 (41)  | 60162/9.5  | 76/90   | 2 (19, 90)          | K.GIRPAINVGLSVSR.V              |
| 449 | -1.15 | 2.02 | 1.75 | mitochondrial isoform X3                                                                | gi 513210248 | ALDH2    | 23/ 174 (49) | 60459/8.5  | 122/134 | 2 (71, 91)          | K.TIPLDGDFFCYTR.H               |
| 452 | -1.34 | 1.87 | 1.36 | vimentin                                                                                | gi 114326309 | VIM      | 41/156 (62)  | 53167/4.94 | 166/119 | 3 (31, 84, 59)      | R.YSLGSALRPSSAR.Y               |
| 459 | -1.22 | 1.91 | 1.42 | desmin                                                                                  | gi 2959450   | DES      | 29/163 (59)  | 51687/5.2  | 173/187 | 3 (62, 73, 114)     | R.TSAVPTLSTFR.T                 |
| 460 | -1.02 | 1.81 | 1.66 | PREDICTED: keratin, type II cytoskeletal 8<br>PREDICTED: aldehyde dehydrogenase,        | gi 513233477 | KRT8     | 22/150 (55)  | 40680/4.8  | 55/183  | 4 (75, 46, 82, 77)  | R.GLFEGYVGTLR.R                 |
| 463 | -1.02 | 1.93 | 1.69 | mitochondrial isoform X3<br>PREDICTED: ATP synthase subunit alpha,                      | gi 513210248 | ALDH2    | 26/140 (49)  | 60459/8.5  | 92/158  | 3 (19, 97, 89)      | K.DIDKANYVSQALR.A               |
| 464 | 1.04  | 1.77 | 1.49 | mitochondrial isoform X2<br>PREDICTED: ATP synthase subunit alpha,                      | gi 363745506 | ATP5A1W  | 25/155 (45)  | 60162/9.5  | 123/139 | 3 (3, 109, 61)      | K.GIRPAINVGLSVSR.V              |
| 470 | 1.18  | 1.87 | 1.24 | mitochondrial isoform X2                                                                | gi 363745506 | ATP5A1W  | 22/174 (37)  | 60263/9.73 | 97/117  | 2 (89, 60)          | R.EAYPGDVFYLHSR.L               |
| 471 | -1.46 | 1.61 | 1.34 | desmin                                                                                  | gi 2959450   | DES      | 25/158 (54)  | 51689/5.2  | 182/252 | 4 (64, 84, 66, 129) | R.TSAVPTLSTFR.T                 |
| 472 | -1.24 | 1.38 | 1.56 | hypothetical protein RCJMB04_32b9                                                       | gi 53136648  |          | 16/161 (39)  | 49428/5.35 | 86/90   | 2 (49, 66)          | R.DFLKPELLR.A                   |
| 486 | -1.05 | 2.00 | 1.48 | tubulin alpha<br>phosphatidylinositol-4,5-bisphosphate 3-kinase                         | gi 223280    |          | 16/118 (49)  | 46259/4.9  | 93/110  | 3 (59, 84, 21)      | K.HQSLGGQYGVR.G                 |
| 487 | -1.22 | 2.40 | 1.80 | catalytic subunit gamma isoform                                                         | gi 313747561 | PIK3CG   | 21/109 (29)  | 129184/6.8 | 66/NS   | NS                  | R.QSMEEVDLKLK.R + Oxidation (M) |
| 496 | -1.05 | 1.85 | 1.52 | tubulin beta-2 chain                                                                    | gi 52138699  | TUBB2B   | 33/187 (76)  | 50377/4.64 | 204/251 | 4 (65, 39, 38, 196) | R.ISEQTAMFR.R                   |
| 500 | -1.19 | 1.97 | 1.54 | tubulin beta-7 chain                                                                    | gi 45384338  | TUBB2A   | 34/197 (81)  | 50095/4.64 | 218/260 | 3 (64, 34, 58, 196) | R.ISEQTAMFR.R                   |
| 503 | -1.00 | 1.81 | 1.70 | PREDICTED: septin-11 isoform X2                                                         | gi 513183226 | SEPT11   | 14/130 (37)  | 51036/6.4  | 84/94   | 3 (45, 27, 79)      | R.SYELQESNVR.L                  |
| 517 | -1.26 | 2.13 | 1.71 | serum albumin precursor                                                                 | gi 45383974  | ALB      | 32/175 (54)  | 71868/5.42 | 96/86   | 2 (72, 40)          | R.VSFLGHFIYSVAR.R               |

|                                                                                      |       |      |      |                                                    |              |          |             |             |         |                      |                                                     |
|--------------------------------------------------------------------------------------|-------|------|------|----------------------------------------------------|--------------|----------|-------------|-------------|---------|----------------------|-----------------------------------------------------|
| 521                                                                                  | -1.23 | 1.72 | 1.31 | ATP synthase subunit beta, mitochondrial precursor | gi 82082513  | ATP5B    | 35/186 (74) | 56650/5.5   | 214/298 | 4 (117, 72, 73, 133) | K.AHGGYSVFAGVGER.T                                  |
| 522                                                                                  | -1.32 | 2.22 | 1.77 | ATP synthase subunit beta, mitochondrial precursor | gi 82082513  | ATP5B    | 37/174 (76) | 56650/5.5   | 276/255 | 4 (97, 78, 51, 121)  | K.AHGGYSVFAGVGER.T                                  |
| 553                                                                                  | -1.17 | 1.61 | 1.29 | vitellogenin                                       | gi 50582493  | VTG      | 45/196 (35) | 163656/10.1 | 120/33  | 1 (33)               | R.FLEVVQLCR.I                                       |
| 554                                                                                  | -1.30 | 2.08 | 1.37 | heat shock protein 47                              | gi 63511     | SERPINH1 | 30/185 (55) | 45711/9.23  | 118/66  | 1 (66)               | R.LYGPASINFADDFVK.N                                 |
| 557                                                                                  | -1.24 | 2.13 | 1.46 | heat shock protein 47                              | gi 63511     | SERPINH1 | 34/203 (65) | 45711/9.23  | 124/71  | 1 (71)               | R.LYGPASINFADDFVK.N<br>R.SYTVGVPMHR.T + 2 Oxidation |
| 566                                                                                  | -1.26 | 2.12 | 1.46 | heat shock protein 47                              | gi 63511     | SERPINH1 | 24/115 (49) | 45711/9.23  | 102/85  | 2 (8, 85)            | (M)                                                 |
| 568                                                                                  | -1.08 | 1.55 | 1.39 | alpha-enolase                                      | gi 46048768  | ENO1     | 20/187 (50) | 47617/6.16  | 99/216  | 3 (73, 62, 144)      | K.VVIGMDVAASEFYR.D                                  |
| 572                                                                                  | 1.18  | 1.86 | 1.38 | heat shock protein 47                              | gi 63511     | Hsp47    | 29/169 (61) | 45711/9.23  | 95/71   | 2 (17, 71)           | R.SYTVGVPMHR.T + Oxidation (M)                      |
| PREDICTED: endoplasmic reticulum resident                                            |       |      |      |                                                    |              |          |             |             |         |                      |                                                     |
| 589                                                                                  | -1.06 | 1.81 | 1.52 | protein 44 isoform X4                              | gi 50736203  | ERP44    | 15/150 (43) | 47318/5.2   | 115/174 | 3 (24, 86, 117)      | K.FRHPLLHIQK.T                                      |
| 590                                                                                  | 1.02  | 1.83 | 1.52 | thioredoxin domain-containing protein 5 precursor  | gi 57530789  | TXNDC5   | 19/177 (43) | 47249/5.5   | 103/225 | 3 (80, 82, 116)      | R.DLESLHSFVLR.Q<br>R.INMPIPTFASLNLR.E + Oxidation   |
| 596                                                                                  | 1.12  | 1.64 | 1.42 | vimentin                                           | gi 114326309 | VIM      | 34/134 (60) | 53167/4.94  | 122/46  | 1 (46)               | (M)<br>R.INMPIPTFASLNLR.E + Oxidation               |
| 599                                                                                  | -1.18 | 1.83 | 1.47 | vimentin                                           | gi 114326309 | VIM      | 31/153 (54) | 53167/4.94  | 111/30  | 1 (30)               | (M)                                                 |
| PREDICTED: probable cation-transporting ATPase                                       |       |      |      |                                                    |              |          |             |             |         |                      |                                                     |
| 602                                                                                  | -1.25 | 1.96 | 1.44 | 13A3 isoform X4                                    | gi 513199476 | ATP13A3  | 25/167 (24) | 146045/6.2  | 63/109  | 1 (109)              | R.LGPHSSAASVYAGAGGSGSR.I                            |
| Chain N, Chicken Cytochrome Bc1 Complex<br>Inhibited By An Iodinated Analogue Of The |       |      |      |                                                    |              |          |             |             |         |                      |                                                     |
| 604                                                                                  | -1.17 | 1.59 | 1.40 | Polyketide Crocacin-d                              | gi 196049785 |          | 24/181 (59) | 49981/5.9   | 112/330 | 3 (81, 168, 142)     | R.ADLASYIDTHFK.A                                    |
| 620                                                                                  | -1.13 | 2.12 | 1.82 | vimentin                                           | gi 114326309 | VIM      | 32/178 (59) | 53167/4.94  | 116/131 | 4 (54, 17, 80, 57)   | K.MALDIEIATYR.K                                     |
| 627                                                                                  | 1.07  | 1.68 | 1.58 | vitellogenin I                                     | gi 1871444   | VTG1     | 39/178 (27) | 212608/9.9  | 61/194  | 3 (65, 74, 118)      | K.MFGQELLFGR.L                                      |
| 646                                                                                  | 1.03  | 1.95 | 1.88 | keratin, type I cytoskeletal 19                    | gi 485049501 | KRT19    | 33/176 (69) | 46067/4.8   | 196/236 | 4 (51, 52, 74, 142)  | K.TKFETEQALR.M                                      |
| 657                                                                                  | -1.13 | 1.47 | 1.51 | vitellogenin                                       | gi 212881    | VTG      | 45/199 (31) | 206862/9.9  | 77/126  | 3 (21, 46, 59)       | K.MFGQELLFGR.L + Oxidation (M)                      |
| 661                                                                                  | 1.17  | 1.57 | 1.43 | vitellogenin I                                     | gi 1871444   | VTG1     | 34/174 (21) | 212608/9.9  | 97/90   | 2 (73, 40)           | K.VPGVTLYYQGLR.V                                    |
| 663                                                                                  | -1.14 | 2.02 | 2.29 | vimentin                                           | gi 114326309 | VIM      | 32/176 (54) | 53167/4.9   | 127/154 | 4 (65, 52, 72, 54)   | R.LGDLYEEEMR.D                                      |
| 665                                                                                  | -1.35 | 2.04 | 1.78 | alpha-actin                                        | gi 211205    | ASMA     | 24/164 (64) | 42367/5.12  | 102/212 | 3 (58, 76, 137)      | R.AVFP SIVGRPR.H                                    |
| 671                                                                                  | -1.35 | 2.03 | 1.75 | beta-actin                                         | gi 211237    |          | 23/172 (72) | 42052/5.18  | 114/NS  | NS                   | R.AVFP SIVGRPR.H                                    |

|      |       |      |      |                                                    |              |              |              |            |         |                      |                        |
|------|-------|------|------|----------------------------------------------------|--------------|--------------|--------------|------------|---------|----------------------|------------------------|
| 677  | 1.06  | 1.71 | 1.25 | vitellogenin                                       | gi 212881    | VTG          | 39/157 (25)  | 206862/9.9 | 92/44   | 2 (44, 20)           | K.VAGNVQAQITPSPR.S     |
| 684  | 1.56  | 1.88 | 1.71 | vitellogenin I                                     | gi 1871444   | VTG1         | 40/179 (28)  | 212608/9.9 | 70/74   | 2 (74, 17)           | K.VPGVTLYYQGLR.V       |
| 710  | -1.09 | 1.69 | 1.47 | vitellogenin                                       | gi 212881    | VTG          | 37/162 (22)  | 365275/4.9 | 63/37   | 2 (37, 9)            | K.VAGNVQAQITPSPR.S     |
|      |       |      |      | NADH dehydrogenase [ubiquinone] 1 alpha            |              |              |              |            |         |                      |                        |
| 742  | -1.07 | 1.61 | 1.34 | subcomplex subunit 10, mitochondrial               | gi 71895153  | NDUFA10      | 13/156 (44)  | 41633/6.2  | 74/78   | 1 (78)               | K.YFPEADIHYQDR.I       |
|      |       |      |      | PREDICTED: macrophage-capping protein-like         |              |              |              |            |         |                      |                        |
| 756  | 1.02  | 1.66 | 1.37 | isoform X6                                         | gi 363747241 | CAPG         | 12/69 (50)   | 38833/5.7  | 84/248  | 1 (17)               | K.SGSLFGPAPTHPGLHIWR.V |
|      |       |      |      | PREDICTED: heterogeneous nuclear                   |              |              |              |            |         |                      |                        |
| 801  | -1.31 | 1.80 | 1.26 | ribonucleoprotein A3-like isoform X8               | gi 513193994 | LOC100859627 | 21/118 (46)  | 40774/9.7  | 117/116 | 2 (52, 91)           | K.IFVGGIKEDTEEYNLR.E   |
|      |       |      |      | PREDICTED: heterogeneous nuclear                   |              |              |              |            |         |                      |                        |
| 818  | -1.23 | 1.68 | 1.32 | ribonucleoprotein A3-like isoform X8               | gi 513193994 | LOC100859627 | 19/132 (41)  | 40774/9.7  | 116/139 | 2 (58, 110)          | K.IFVGGIKEDTEEYNLR.E   |
| 871  | 1.14  | 1.51 | 1.21 | 60S acidic ribosomal protein P0                    | gi 45384494  | RPLP0        | 12/139 (56)  | 34435/5.64 | 114/205 | 3 (78, 94, 94)       | K.IIQLDDYPK.C          |
| 884  | -1.02 | 2.17 | 1.87 | glyceraldehyde-3-phosphate dehydrogenase           | gi 46048961  | GAPDH        | 19/201 (65)  | 35909/9.4  | 128/262 | 3 (122, 25, 115)     | R.VPTPNVSVVDLTCR.L     |
|      |       |      |      | Chain L, Remodeling Of Actin Filaments By Adf      |              |              |              |            |         |                      |                        |
| 904  | -1.17 | 1.73 | 1.75 | Cofilin Protein                                    | gi 364505923 |              | 22/ 196 (63) | 41921/5.2  | 96/166  | 2 (60, 134)          | K.IWHHTFYNELR.V        |
| 907  | 1.18  | 1.89 | 1.70 | annexin A2                                         | gi 45382533  | ANXA2        | 19/116 (63)  | 38901/7.6  | 144/27  | 2 (28, 25)           | K.GVDEVTIINILTNR.S     |
| 927  | 1.09  | 1.63 | 1.57 | annexin A2                                         | gi 45382533  | ANXA2        | 20/116 (64)  | 38901/7.6  | 175/300 | 4 (102, 83, 107, 98) | K.GVDEVTIINILTNR.S     |
| 935  | -1.05 | 1.63 | 1.24 | annexin A2                                         | gi 45382533  | ANXA2        | 16/111 (52)  | 38901/7.6  | 90/78   | 1 (78)               | K.GVDEVTIINILTNR.S     |
|      |       |      |      | guanine nucleotide-binding protein G(I)/G(S)/G(T)  |              |              |              |            |         |                      |                        |
| 936  | -1.16 | 1.75 | 1.41 | subunit beta-1                                     | gi 392513682 | GNB1         | 20/190 (67)  | 38121/5.6  | 97/294  | 4 (74, 36, 112, 159) | K.IYAMHWGTDSTR.L       |
| 939  | -1.57 | 1.21 | 1.04 | heterogeneous nuclear ribonucleoproteins A2/B1     | gi 71896753  | HNRNPA2B1    | 16/145 (48)  | 37019/9.1  | 109/184 | 2 (105, 103)         | R.GGGGNFGPGPSNFR.G     |
| 941  | 1.01  | 1.63 | 1.44 | capping protein alpha 2 isoform                    | gi 211423    | CapZ         | 12/199 (67)  | 32939/5.47 | 103/287 | 4 (86, 149, 55, 82)  | R.LLLNNDNLLR.E         |
|      |       |      |      | PREDICTED: coiled-coil domain-containing           |              |              |              |            |         |                      | R.IMEGPAFNYLDAPAVR.V + |
| 981  | 1.04  | 1.60 | 1.46 | protein 141 isoform X3                             | gi 513193898 | CCDC141      | 43/181 (28)  | 191003/5.3 | 85/NS   | NS                   | Oxidation (M)          |
|      |       |      |      | guanine nucleotide-binding protein subunit beta-2- |              |              |              |            |         |                      |                        |
| 984  | -1.23 | 1.52 | 1.34 | like 1                                             | gi 52138659  | GNB2L1       | 12/178 (66)  | 35511/8.88 | 105/96  | 2 (77, 44)           | R.DETNYGIPQR.A         |
| 1003 | -1.19 | 2.09 | 1.81 | annexin A5                                         | gi 71895873  | ANXA5        | 24/121 (61)  | 36290/5.49 | 158/188 | 3 (54, 82, 113)      | K.ITGETSGHFQR.L        |
|      |       |      |      | PREDICTED: LOW QUALITY PROTEIN:                    |              |              |              |            |         |                      |                        |
| 1011 | 1.03  | 1.51 | 1.59 | annexin A4-like                                    | gi 513220828 | LOC772393    | 19/68 (58)   | 35829/5.0  | 117/291 | 2 (48, 71)           | K.GVSSFNPEQEAQALR.K    |

|      |       |      |       |                                                     |              |             |             |            |         |                  |                                |
|------|-------|------|-------|-----------------------------------------------------|--------------|-------------|-------------|------------|---------|------------------|--------------------------------|
| 1024 | 1.32  | 1.61 | 1.37  | PREDICTED: actin, cytoplasmic 2-like isoform X1     | gi 363740848 | LOC776816   | 20/178 (62) | 42108/5.2  | 78/207  | 2 (100, 138)     | K.QEYDESGPSIVHR.K              |
| 1040 | 1.32  | 1.54 | 1.46  | electron-transfer-flavoprotein, alpha polypeptide   | gi 71895681  | ETFA        | 13/151 (48) | 36999/9.66 | 103/168 | 2 (77, 120)      | K.VLVAQHDVYK.G                 |
| 1060 | 1.03  | 1.35 | 1.75  | Mx protein                                          | gi 146744156 | Mx          | 12/130 (50) | 80335/7.1  | 58/NS   | NS               | R.SALGHTIEDLKEALR.T            |
|      |       |      |       | PREDICTED: nebulin-related-anchoring protein        |              |             |             |            |         |                  |                                |
| 1061 | 1.88  | 1.55 | 1.17  | isoform X2                                          | gi 513191976 | NRAP        | 39/151 (25) | 199352/9.7 | 65/NS   | NS               | R.GLCAIAQAESLR.Y               |
| 1066 | 1.04  | 2.06 | 2.05  | vitellogenin III, partial                           | gi 555477    | vtgIII      | 11/88 (34)  | 30643/9.44 | 70/28   | 1 (26)           | R.NEQPTGYQLVLYTDR.Q            |
| 1070 | -1.11 | 2.06 | 1.70  | voltage-dependent anion-selective channel protein 2 | gi 46048903  | VDAC2       | 8/79 (44)   | 30293/9.2  | 77/264  | 1 (126)          | K.VNNSSLVGVGYTQTLRPGVK.L       |
| 1072 | 1.13  | 2.15 | 1.72  | voltage-dependent anion-selective channel protein 2 | gi 46048903  | VDAC2       | 13/189 (58) | 30293/9.2  | 107/333 | 3 (91, 173, 126) | K.WAEYGLTFTEK.W                |
|      |       |      |       | PREDICTED: transformation/transcription domain-     |              |             |             |            |         |                  |                                |
| 1077 | -1.15 | 1.22 | 1.53  | associated protein                                  | gi 513207800 | TRRAP       | 50/144 (16) | 440291/9.3 | 58/14   | 1 (14)           | R.EVVTQKNLSGLVPIR.D            |
| 1085 | 1.14  | 1.82 | 1.80  | actin, cytoplasmic type 5                           | gi 56119084  | ACTG1       | 14/128 (40) | 42151/5.2  | 70/199  | 2 (96, 135)      | K.QEYDESGPSIVHR.K              |
| 1086 | 1.04  | 1.90 | 1.40  | vitellogenin III, partial                           | gi 555477    | vtgIII      | 9/57 (25)   | 30643/9.44 | 78/70   | 1 (70)           | R.NEQPTGYQLVLYTDR.Q            |
| 1087 | 1.14  | 1.68 | 1.18  | endoplasmic reticulum resident protein 29 precursor | gi 444741647 | ERP29       | 11/157 (51) | 28288/8.6  | 73/105  | 1 (105)          | K.ILEQGEEFAANEVVR.I            |
| 1118 | 1.03  | 1.58 | 1.25  | proteasome subunit alpha type-5                     | gi 71897167  | PSMA5       | 14/127 (53) | 26601/4.6  | 86/115  | 2 (99, 47)       | R.AIGSASEGAQSSSQEVYHK.S        |
| 1134 | 1.01  | 1.70 | 1.47  | PREDICTED: peroxiredoxin-4 isoformX2                | gi 118084001 | PRDX4       | 17/194 (72) | 29843/6.3  | 123/193 | 3 (45, 82, 127)  | R.QITMNDLPVGR.S                |
| 1144 | -1.03 | 1.58 | 1.37  | triosephosphate isomerase                           | gi 45382061  | TPH1        | 18/132 (84) | 26832/6.87 | 169/273 | 1 (132)          | K.LSADTEVVCGAPSIYLDLFAR.Q      |
| 1179 | 1.74  | 1.89 | -1.02 | heat shock protein 25                               | gi 50838655  | Hsp25       | NS          | 19086/6.4  | NS/139  | 2 (85, 81)       | R.MHLAPFASSSLATRL              |
|      |       |      |       | PREDICTED: thioredoxin-dependent peroxide           |              |             |             |            |         |                  |                                |
| 1191 | -1.01 | 1.75 | 1.44  | reductase, mitochondrial isoform X7                 | gi 513192164 | PRDX3       | 10/135 (58) | 27595/9.9  | 72/191  | 2 (94, 130)      | K.HLSINDLPVGR.S                |
| 1205 | 1.07  | 1.53 | 1.18  | peroxiredoxin-1                                     | gi 429836849 | PRDX1       | NS          | 22529/9.1  | NS/148  | 3 (79, 71, 63)   | R.LVQAFQFTDK.H                 |
| 1209 | -1.04 | 1.96 | 1.60  | peroxiredoxin-1                                     | gi 429836849 | PRDX1       | 8/106 (53)  | 22529/9.1  | 79/180  | 3 (69, 64, 111)  | R.LVQAFQFTDK.H                 |
| 1210 | 1.06  | 2.08 | 1.69  | peroxiredoxin-1                                     | gi 429836849 | PRDX1       | NS          | 440291/9.3 | NS/204  | 3 (60, 82, 120)  | R.LVQAFQFTDK.H                 |
|      |       |      |       | superoxide dismutase [Mn], mitochondrial            |              |             |             |            |         |                  |                                |
| 1243 | -1.32 | 1.65 | 1.35  | precursor                                           | gi 45383702  | SOD2        | NS          | 25159      | NS/119  | 1 (119)          | K.HHATYVNNLNVTEEK.Y            |
|      |       |      |       |                                                     |              |             |             |            |         |                  | R.DCISQDEMFSDIYK.I + Oxidation |
| 1255 | 1.69  | 1.63 | 1.38  | transrationally controlled tumor protein            | gi 517091    |             | 11/52 (50)  | 19689/4.76 | 73/90   | 1 (90)           | (M)                            |
|      |       |      |       | PREDICTED: adenomatous polyposis coli protein       |              |             |             |            |         |                  |                                |
| 1380 | -1.10 | 1.62 | 1.34  | isoform X1                                          | gi 513231333 | CTC-554D6.1 | 44/143 (18) | 314856/7.7 | 62/247  | 3 (69, 68, 166)  | R.IIPGFMCQGGDFTR.H             |



| PREDICTED: adenomatous polyposis coli protein      |       |       |       |                                            |              |             |             |            |         |                     |                      |
|----------------------------------------------------|-------|-------|-------|--------------------------------------------|--------------|-------------|-------------|------------|---------|---------------------|----------------------|
| 1381                                               | -1.47 | -1.65 | -1.68 | isoform X5                                 | gi 513231336 | CTC-554D6.1 | 36/124 (16) | 313895/7.9 | 82/82   | 1 (82)              | K.APVEQEVAIHR.I      |
| 1430                                               | -1.07 | 1.63  | 1.45  | vitellogenin                               | gi 212881    | VTG         | 39/149 (24) | 206862/9.9 | 91/NS   | NS                  | R.VRHPATNTVVEDHVK.G  |
| 1431                                               | -1.32 | 1.77  | 1.56  | glyceraldehyde-3-phosphate dehydrogenase   | gi 46048961  | GAPDH       | 19/140 (53) | 35909/9.4  | 97/268  | 3 (126, 67, 129)    | R.VPTPNVSVVDLTCR.L   |
| guanine nucleotide-binding protein subunit beta-2- |       |       |       |                                            |              |             |             |            |         |                     |                      |
| 1432                                               | 1.33  | 1.92  | 1.49  | like 1                                     | gi 52138659  | GNB2L1      | 18/164 (79) | 35511/8.88 | 157/150 | 2 (68, 108)         | R.DETNYGIPQR.A       |
| 1434                                               | 1.04  | 2.15  | 1.56  | tubulin alpha                              | gi 223280    |             | 16/143 (49) | 46259/4.86 | 106/199 | 3 (94, 30, 133)     | R.AVFDLEPTVIDEVR.T   |
| PREDICTED: cytoskeleton-associated protein 4,      |       |       |       |                                            |              |             |             |            |         |                     |                      |
| 1435                                               | -1.09 | 2.23  | 1.56  | partial                                    | gi 513159594 | CKAP4       | 28/133 (56) | 54564/4.8  | 148/81  | 2 (42, 71)          | K.FNSVEGSVDEL.R.S    |
| 1436                                               | -1.05 | 1.65  | 1.50  | protein disulfide-isomerase precursor      | gi 312283582 | P4HB        | 19/140 (56) | 57772/4.56 | 114/216 | 4 (109, 19, 94, 75) | R.AANFEQALAAHR.H     |
| 1438                                               | -1.02 | 1.99  | 1.83  | kelch-like protein 7                       | gi 61098073  | KLHL7       | 17/136 (31) | 67293/6.19 | 58/NS   | NS                  | K.SYELPDGQVITIGNER.F |
| 1439                                               | 1.05  | 1.53  | 1.45  | SPRY domain-containing protein 7           | gi 57529266  | SPRYD7      | 13/148 (47) | 22120/6.34 | 77/NS   | NS                  | K.AVGISNFNHEQIER.I   |
| Chain A, Crystal Structure Of Aluminum-Bound       |       |       |       |                                            |              |             |             |            |         |                     |                      |
| 1440                                               | 1.03  | 1.51  | 1.31  | Ovotransferrin At 2.15 Angstrom Resolution | gi 83754919  |             | 29/141 (52) | 77518/6.8  | 153/165 | 3 (56,29, 134)      | R.SAGWNIPIGTLIHR.G   |

<sup>a</sup> Average ratio of differential expression ( $P < 0.05$ ) between heat-stressed TCCs with 0 hours recovery (R0)/2-hour recovery (R2)/6 hour (R6) and non-heat-stressed chickens (C) analyzed from triplicate gels. The ratio over 1.3-fold means significant difference. -, represents downregulation.

<sup>b</sup> The column refers to the results of the MALDI-MS PMF analysis, i.e., the number of assigned peptides and percent sequence coverage.

Abbreviations: LIFT, laser-induced forward transfer; MALDI-MS, matrix-assisted laser desorption/ionization mass spectrometer; TOF, time of flight; NS, no significant match; PMF, peptide mass fingerprinting
